# Supplementary material for: Why is announcement training more effective than conversation training for introducing HPV vaccination? A theory-based investigation
Source: PubMed Central journal article supplement (PMC5907716; doi:10.1186/s13012-018-0743-8), 2018-04-19
Supplement: 13012_2018_743_MOESM2_ESM.pdf [file 13012_2018_743_MOESM2_ESM.pdf]

## Pre-Training Survey

1. What is your position at this clinic or practice?
 

|                                           |                                                        |
|-------------------------------------------|--------------------------------------------------------|
| <input type="checkbox"/> Pediatrician     | <input type="checkbox"/> Physician assistant           |
| <input type="checkbox"/> Family physician | <input type="checkbox"/> Nurse practitioner            |
| <input type="checkbox"/> Other physician  | <input type="checkbox"/> Other (please specify): _____ |
  
2. How many years have you been in this or a similar position?  
(Count only years after training/residency/fellowship.)
 

|                                 |                                  |                                    |                                    |                                  |
|---------------------------------|----------------------------------|------------------------------------|------------------------------------|----------------------------------|
| <input type="checkbox"/> <5 yrs | <input type="checkbox"/> 5-9 yrs | <input type="checkbox"/> 10-14 yrs | <input type="checkbox"/> 15-19 yrs | <input type="checkbox"/> ≥20 yrs |
|---------------------------------|----------------------------------|------------------------------------|------------------------------------|----------------------------------|
  
3. About how many 11-17 year old patients do you see in a typical week?
 

|                            |                              |                              |                                |                                |                              |
|----------------------------|------------------------------|------------------------------|--------------------------------|--------------------------------|------------------------------|
| <input type="checkbox"/> 0 | <input type="checkbox"/> 1-4 | <input type="checkbox"/> 5-9 | <input type="checkbox"/> 10-14 | <input type="checkbox"/> 15-19 | <input type="checkbox"/> ≥20 |
|----------------------------|------------------------------|------------------------------|--------------------------------|--------------------------------|------------------------------|
  
4. Of these patients, about how many are 11-12 year olds?
 

|                               |                               |                                     |                               |                              |
|-------------------------------|-------------------------------|-------------------------------------|-------------------------------|------------------------------|
| <input type="checkbox"/> None | <input type="checkbox"/> Some | <input type="checkbox"/> About half | <input type="checkbox"/> Most | <input type="checkbox"/> All |
|-------------------------------|-------------------------------|-------------------------------------|-------------------------------|------------------------------|
  
5. Are you ...
 

|                               |                                 |
|-------------------------------|---------------------------------|
| <input type="checkbox"/> Male | <input type="checkbox"/> Female |
|-------------------------------|---------------------------------|

Say how much you agree or disagree with the following statements about HPV vaccine for 11-12 year olds.

|                                                                                     | Strongly disagree        | Disagree                 | Neither agree nor disagree | Agree                    | Strongly agree           |
|-------------------------------------------------------------------------------------|--------------------------|--------------------------|----------------------------|--------------------------|--------------------------|
| 6. HPV vaccine coverage is much lower than Tdap vaccine coverage in North Carolina. | <input type="checkbox"/> | <input type="checkbox"/> | <input type="checkbox"/>   | <input type="checkbox"/> | <input type="checkbox"/> |
| 7. HPV vaccine is effective.                                                        | <input type="checkbox"/> | <input type="checkbox"/> | <input type="checkbox"/>   | <input type="checkbox"/> | <input type="checkbox"/> |
| 8. Most parents think HPV vaccination is important for their 11 or 12 year olds.    | <input type="checkbox"/> | <input type="checkbox"/> | <input type="checkbox"/>   | <input type="checkbox"/> | <input type="checkbox"/> |
| 9. I promote HPV vaccination as part of routine adolescent care.                    | <input type="checkbox"/> | <input type="checkbox"/> | <input type="checkbox"/>   | <input type="checkbox"/> | <input type="checkbox"/> |
| 10. A clinician's recommendation greatly increases HPV vaccination.                 | <input type="checkbox"/> | <input type="checkbox"/> | <input type="checkbox"/>   | <input type="checkbox"/> | <input type="checkbox"/> |
| 11. When discussing HPV vaccine, I feel confident addressing parents' concerns.     | <input type="checkbox"/> | <input type="checkbox"/> | <input type="checkbox"/>   | <input type="checkbox"/> | <input type="checkbox"/> |
| 12. Talking with patients and parents about HPV vaccination takes too long.         | <input type="checkbox"/> | <input type="checkbox"/> | <input type="checkbox"/>   | <input type="checkbox"/> | <input type="checkbox"/> |

13. What is your role in adolescent vaccination? Do you ...

(Mark all that apply.)

- |                                                                   |                                                                        |
|-------------------------------------------------------------------|------------------------------------------------------------------------|
| <input type="checkbox"/> Schedule appointments                    | <input type="checkbox"/> Administer vaccines                           |
| <input type="checkbox"/> Prescribe vaccines                       | <input type="checkbox"/> Document vaccinations                         |
| <input type="checkbox"/> Answer parents' questions about vaccines | <input type="checkbox"/> I don't have a role in adolescent vaccination |

**If you prescribe vaccines or answer questions about vaccines, please continue.**

Otherwise, stop here and return your survey to the facilitator.

Say how much you agree or disagree with the following statements about recommending HPV vaccine for 11-12 year olds.

|                                                                                        | Strongly disagree        | Disagree                 | Neither agree nor disagree | Agree                    | Strongly agree           |
|----------------------------------------------------------------------------------------|--------------------------|--------------------------|----------------------------|--------------------------|--------------------------|
| 14. I start routinely recommending HPV vaccine when patients turn 11 or 12.            | <input type="checkbox"/> | <input type="checkbox"/> | <input type="checkbox"/>   | <input type="checkbox"/> | <input type="checkbox"/> |
| 15. I know how to recommend HPV vaccine in a way that leads to vaccination.            | <input type="checkbox"/> | <input type="checkbox"/> | <input type="checkbox"/>   | <input type="checkbox"/> | <input type="checkbox"/> |
| 16. When I recommend HPV vaccine, I say it is very important.                          | <input type="checkbox"/> | <input type="checkbox"/> | <input type="checkbox"/>   | <input type="checkbox"/> | <input type="checkbox"/> |
| 17. When I recommend HPV vaccine, I emphasize that it can prevent cancer.              | <input type="checkbox"/> | <input type="checkbox"/> | <input type="checkbox"/>   | <input type="checkbox"/> | <input type="checkbox"/> |
| 18. When I recommend HPV vaccine, I recommend getting it that day.                     | <input type="checkbox"/> | <input type="checkbox"/> | <input type="checkbox"/>   | <input type="checkbox"/> | <input type="checkbox"/> |
| 19. I recommend HPV vaccine more often for adolescents at higher risk for getting HPV. | <input type="checkbox"/> | <input type="checkbox"/> | <input type="checkbox"/>   | <input type="checkbox"/> | <input type="checkbox"/> |

For adolescent patients, how long does it usually take you to talk about ...

- |                           |               |               |
|---------------------------|---------------|---------------|
| 20. HPV vaccine           | _____ minutes | _____ seconds |
| 21. Tdap vaccine          | _____ minutes | _____ seconds |
| 22. Meningococcal vaccine | _____ minutes | _____ seconds |

23. Some clinicians first talk about adolescent vaccines by announcing the child is due for meningitis, HPV, and Tdap vaccines, and then saying, “We’ll give those at the end of the visit.”

How often did you use this approach when talking about HPV vaccination in the last two weeks?

- Never       Rarely       Sometimes       Often       Always

24. Some clinicians first talk about adolescent vaccines by starting a conversation about the health benefits of meningitis, HPV, and Tdap vaccines, and then asking, “What questions do you have?”

How often did you use this approach when talking about HPV vaccination in the last two weeks?

- Never       Rarely       Sometimes       Often       Always

25. At what other practices or clinics do you provide adolescent vaccines?

- Only at the practice or clinic where I attended the training  
 I also provide adolescent vaccines at: \_\_\_\_\_ on \_\_\_\_\_ days a week  
 I also provide adolescent vaccines at: \_\_\_\_\_ on \_\_\_\_\_ days a week

**Thank you!** Please return your completed survey to the facilitator.

## Applying to Your Practice

Consider taking a first step toward routinely using this communication strategy in your practice. Whenever we think about practicing a new skill, it can be easy to forget or just “never get around to it.” Making a specific plan about exactly when, where, and how we’ll do something can be helpful.

### My two-week plan

If within two weeks I have not used this communication strategy to recommend HPV vaccine with five patients who are 11-12 years old, I will use the strategy with the **next five** patients who are 11-12 years old.

I agree to do this     I may not do this     I do not see 11-12 year old patients

While we encourage you to use the strategy with all adolescents, it is especially important to use it with 11-12 year old patients.

## CME Survey

The next questions are about the **communication strategy** you learned in today’s training.

Say how much you agree or disagree with the following statements about HPV vaccine for 11-12 year olds.

| Using this communication strategy will...                                                         | Strongly disagree                                                                                                                                                                                       | Disagree                 | Neither agree nor disagree | Agree                    | Strongly agree           |
|---------------------------------------------------------------------------------------------------|---------------------------------------------------------------------------------------------------------------------------------------------------------------------------------------------------------|--------------------------|----------------------------|--------------------------|--------------------------|
| 1. be easy for me to do.                                                                          | <input type="checkbox"/>                                                                                                                                                                                | <input type="checkbox"/> | <input type="checkbox"/>   | <input type="checkbox"/> | <input type="checkbox"/> |
| 2. help me to promote HPV vaccination as part of routine adolescent care.                         | <input type="checkbox"/>                                                                                                                                                                                | <input type="checkbox"/> | <input type="checkbox"/>   | <input type="checkbox"/> | <input type="checkbox"/> |
| 3. help me emphasize HPV vaccine as a way to prevent cancer.                                      | <input type="checkbox"/>                                                                                                                                                                                | <input type="checkbox"/> | <input type="checkbox"/>   | <input type="checkbox"/> | <input type="checkbox"/> |
| 4. help me address parents’ HPV vaccine concerns.                                                 | <input type="checkbox"/>                                                                                                                                                                                | <input type="checkbox"/> | <input type="checkbox"/>   | <input type="checkbox"/> | <input type="checkbox"/> |
| 5. I plan to use this communication strategy to recommend HPV vaccine for my adolescent patients. | <input type="checkbox"/> Strongly disagree <input type="checkbox"/> Disagree <input type="checkbox"/> Neither agree nor disagree <input type="checkbox"/> Agree <input type="checkbox"/> Strongly agree |                          |                            |                          |                          |

Say how much you agree or disagree with the following statements about HPV vaccine for 11-12 year olds.

|                                                                                     | Strongly disagree        | Disagree                 | Neither agree nor disagree | Agree                    | Strongly agree           |
|-------------------------------------------------------------------------------------|--------------------------|--------------------------|----------------------------|--------------------------|--------------------------|
| 6. HPV vaccine coverage is much lower than Tdap vaccine coverage in North Carolina. | <input type="checkbox"/> | <input type="checkbox"/> | <input type="checkbox"/>   | <input type="checkbox"/> | <input type="checkbox"/> |
| 7. HPV vaccine is effective.                                                        | <input type="checkbox"/> | <input type="checkbox"/> | <input type="checkbox"/>   | <input type="checkbox"/> | <input type="checkbox"/> |
| 8. Most parents think HPV vaccination is important for their 11 or 12 year olds.    | <input type="checkbox"/> | <input type="checkbox"/> | <input type="checkbox"/>   | <input type="checkbox"/> | <input type="checkbox"/> |
| 9. A clinician's recommendation greatly increases HPV vaccination.                  | <input type="checkbox"/> | <input type="checkbox"/> | <input type="checkbox"/>   | <input type="checkbox"/> | <input type="checkbox"/> |
| 10. I know how to recommend HPV vaccine in a way that leads to vaccination.         | <input type="checkbox"/> | <input type="checkbox"/> | <input type="checkbox"/>   | <input type="checkbox"/> | <input type="checkbox"/> |
| 11. When discussing HPV vaccine, I feel confident addressing parents' concerns.     | <input type="checkbox"/> | <input type="checkbox"/> | <input type="checkbox"/>   | <input type="checkbox"/> | <input type="checkbox"/> |

Please tell us about your experience with this training.

|                                                       | Fair                                                     | Good                     | Very Good                | Excellent                |
|-------------------------------------------------------|----------------------------------------------------------|--------------------------|--------------------------|--------------------------|
| 12. Training content                                  | <input type="checkbox"/>                                 | <input type="checkbox"/> | <input type="checkbox"/> | <input type="checkbox"/> |
| 13. Practical value of the training to me             | <input type="checkbox"/>                                 | <input type="checkbox"/> | <input type="checkbox"/> | <input type="checkbox"/> |
| 14. The presenter's knowledge of the material         | <input type="checkbox"/>                                 | <input type="checkbox"/> | <input type="checkbox"/> | <input type="checkbox"/> |
| 15. Overall satisfaction with the training            | <input type="checkbox"/>                                 | <input type="checkbox"/> | <input type="checkbox"/> | <input type="checkbox"/> |
| 16. Would you recommend this training to a colleague? | <input type="checkbox"/> Yes <input type="checkbox"/> No |                          |                          |                          |

17. List a key **strength** of this communication training:

18. List a key **weakness** of this communication training:

**Thank you!** Please return your completed survey to the facilitator

## HPV Vaccine Communication Survey

Complete this survey after practicing the HPV vaccination communication strategy with at least five 11-12 year old patients. If you do not expect to see five 11-12 year old patients within the next month, then complete the survey after practicing with five HPV vaccine-eligible patients.

**You will receive \$100 for completing this survey.**

1. Which patients did you use this communication strategy with? (Mark all that apply.)

- 11-12 year olds
- 13-17 year olds
- Other ages, please specify: \_\_\_\_\_
- I did not use this communication strategy in the past month **[SKIP TO QUESTION 8]**

Say how much you agree or disagree with the following statements about HPV vaccine for 11-12 year olds.

| Using this communication strategy...                              | Strongly disagree        | Disagree                 | Neither agree nor disagree | Agree                    | Strongly agree           |
|-------------------------------------------------------------------|--------------------------|--------------------------|----------------------------|--------------------------|--------------------------|
| 1. is easy for me to do.                                          | <input type="checkbox"/> | <input type="checkbox"/> | <input type="checkbox"/>   | <input type="checkbox"/> | <input type="checkbox"/> |
| 2. saves me time.                                                 | <input type="checkbox"/> | <input type="checkbox"/> | <input type="checkbox"/>   | <input type="checkbox"/> | <input type="checkbox"/> |
| 3. helps me make HPV vaccination part of routine adolescent care. | <input type="checkbox"/> | <input type="checkbox"/> | <input type="checkbox"/>   | <input type="checkbox"/> | <input type="checkbox"/> |
| 4. helps me address parents' HPV vaccine concerns.                | <input type="checkbox"/> | <input type="checkbox"/> | <input type="checkbox"/>   | <input type="checkbox"/> | <input type="checkbox"/> |
| 5. increases HPV vaccination in my clinic or practice.            | <input type="checkbox"/> | <input type="checkbox"/> | <input type="checkbox"/>   | <input type="checkbox"/> | <input type="checkbox"/> |

6. As a result of using this communication strategy, do you think parent satisfaction with clinic visits ...

- Decreased a lot    Decreased a little    Did not change    Increased a little    Increased a lot

7. I plan to routinely use this communication strategy to recommend HPV vaccine for my adolescent patients.

- Strongly disagree    Disagree    Neither agree nor disagree    Agree    Strongly agree

For adolescent patients, how long does it usually take you to talk about ...

8. HPV vaccine                      \_\_\_\_\_ minutes      \_\_\_\_\_ seconds
9. Tdap vaccine                      \_\_\_\_\_ minutes      \_\_\_\_\_ seconds
10. Meningococcal vaccine                      \_\_\_\_\_ minutes      \_\_\_\_\_ seconds

Say how much you agree or disagree with the following statements about HPV vaccine for 11-12 year olds.

|                                                                                        | Strongly disagree        | Disagree                 | Neither agree nor disagree | Agree                    | Strongly agree           |
|----------------------------------------------------------------------------------------|--------------------------|--------------------------|----------------------------|--------------------------|--------------------------|
| 11. Most parents think HPV vaccination is important for their 11 or 12 year olds.      | <input type="checkbox"/> | <input type="checkbox"/> | <input type="checkbox"/>   | <input type="checkbox"/> | <input type="checkbox"/> |
| 12. I start routinely recommending HPV vaccine when patients turn 11 or 12.            | <input type="checkbox"/> | <input type="checkbox"/> | <input type="checkbox"/>   | <input type="checkbox"/> | <input type="checkbox"/> |
| 13. I promote HPV vaccination as part of routine adolescent care.                      | <input type="checkbox"/> | <input type="checkbox"/> | <input type="checkbox"/>   | <input type="checkbox"/> | <input type="checkbox"/> |
| 14. I know how to recommend HPV vaccine in a way that leads to vaccination.            | <input type="checkbox"/> | <input type="checkbox"/> | <input type="checkbox"/>   | <input type="checkbox"/> | <input type="checkbox"/> |
| 15. When I recommend HPV vaccine, I say it is very important.                          | <input type="checkbox"/> | <input type="checkbox"/> | <input type="checkbox"/>   | <input type="checkbox"/> | <input type="checkbox"/> |
| 16. When I recommend HPV vaccine, I emphasize that it can prevent cancer.              | <input type="checkbox"/> | <input type="checkbox"/> | <input type="checkbox"/>   | <input type="checkbox"/> | <input type="checkbox"/> |
| 17. When I recommend HPV vaccine, I recommend getting it that day.                     | <input type="checkbox"/> | <input type="checkbox"/> | <input type="checkbox"/>   | <input type="checkbox"/> | <input type="checkbox"/> |
| 18. I recommend HPV vaccine more often for adolescents at higher risk for getting HPV. | <input type="checkbox"/> | <input type="checkbox"/> | <input type="checkbox"/>   | <input type="checkbox"/> | <input type="checkbox"/> |
| 19. When discussing HPV vaccine, I feel confident addressing parents' concerns.        | <input type="checkbox"/> | <input type="checkbox"/> | <input type="checkbox"/>   | <input type="checkbox"/> | <input type="checkbox"/> |
| 20. Talking with patients and parents about HPV vaccination takes too long.            | <input type="checkbox"/> | <input type="checkbox"/> | <input type="checkbox"/>   | <input type="checkbox"/> | <input type="checkbox"/> |

21. Some clinicians first talk about adolescent vaccines by announcing the child is due for meningitis, HPV, and Tdap vaccines, and then saying, "We'll give those at the end of the visit."

How often did you use this approach when talking about HPV vaccination in the last two weeks?

- Never       Rarely       Sometimes       Often       Always

22. Some clinicians first talk about adolescent vaccines by starting a conversation about the health benefits of meningitis, HPV, and Tdap vaccines, and then asking, "What questions do you have?"

How often did you use this approach when talking about HPV vaccination in the last two weeks?

- Never       Rarely       Sometimes       Often       Always

23. May we contact you in the future about your experience with using this communication strategy?

- Yes       No

**Thank you!** Please return survey to Dr. Christine Lathren, UNC HB, CB7440, Chapel Hill, NC 27599
